# Supplementary material for: Support for the Microgenderome: Associations in a Human Clinical Population
Source: PubMed Central journal article supplement (PMC4725945; doi:10.1038/srep19171), 2016-01-13
Supplement: srep19171-s1.pdf [file srep19171-s1.pdf]

# Supplementary Information for

## Support for the Microgenderome: Associations in a Human Clinical Population

Amy Wallis<sup>1\*</sup>, Henry Butt<sup>2</sup>, Michelle Ball<sup>1</sup>, Donald P. Lewis<sup>3</sup>, Dorothy Bruck<sup>1</sup>

<sup>1</sup>Psychology Department, Victoria University, Victoria, Australia.

<sup>2</sup>Bioscreen (Aust) Pty Ltd, Victoria, Australia.

<sup>3</sup>CFS Discovery Clinic, Donvale, Victoria, Australia.

\*Correspondence to: [amy.wallis@vu.edu.au](mailto:amy.wallis@vu.edu.au)

### **This PDF file includes:**

Tables S1 to S3

| Factor Structure from BPQ Items |                                                       | International Consensus Criteria (10)                      |
|---------------------------------|-------------------------------------------------------|------------------------------------------------------------|
| <b>F1</b>                       | <b>Exertion and Fatigue</b> ( <i>n</i> = 3)           | A. Postexertional neuroimmune exhaustion:<br>Compulsory    |
| 14.                             | Feeling low in energy or fatigued                     |                                                            |
| 50.                             | Avoiding certain activities due to physical problems  |                                                            |
| 58.                             | Unusual post exertion/exercise fatigue                |                                                            |
|                                 |                                                       | B. Neurological Impairments                                |
| <b>F2</b>                       | <b>Neurocognitive Symptoms</b> ( <i>n</i> = 9)        | 1. Neurocognitive impairments                              |
| 9.                              | Trouble remembering things                            | a. Difficulty processing information                       |
| 38.                             | Having to do things slowly to ensure they are correct | b. Short-term memory loss                                  |
| 46.                             | Difficulty in making decisions                        |                                                            |
| 51.                             | Mind going blank                                      |                                                            |
| 55.                             | Trouble concentrating                                 |                                                            |
| 62.                             | Forgetfulness                                         |                                                            |
| 69.                             | Feelings of mental tiredness or fatigue               |                                                            |
| 70.                             | Difficulty using words or language                    |                                                            |
| 78.                             | Mental confusion or losing your train of thought      |                                                            |
| <b>F3</b>                       | <b>Pain Symptoms</b> ( <i>n</i> = 13)                 | 2. Pain                                                    |
| 1.                              | Headaches                                             | a. Headaches                                               |
| 7.                              | Migraine headaches                                    | b. Significant pain                                        |
| 10.                             | Frequent muscle cramps                                |                                                            |
| 13.                             | Face pain or tenderness                               |                                                            |
| 15.                             | Neck pain or tenderness                               |                                                            |
| 16.                             | Shoulder pain or tenderness                           |                                                            |
| 21.                             | Arm pain or tenderness                                |                                                            |
| 22.                             | Leg pain or tenderness                                |                                                            |
| 24.                             | Stiff or painful joints first thing in the morning    |                                                            |
| 25.                             | Joints that hurt when you move                        |                                                            |
| 26.                             | Locking or clicking of jaw                            |                                                            |
| 27.                             | Pain or tenderness in your lower back                 |                                                            |
| 42.                             | Muscle soreness or stiffness                          |                                                            |
| <b>F4</b>                       | <b>Sleep Symptoms</b> ( <i>n</i> = 4)                 | 3. Sleep disturbances                                      |
| 34.                             | Unrefreshed or prolonged sleep                        | a. Disturbed sleep patterns                                |
| 44.                             | Trouble falling asleep                                | b. Unrefreshed sleep                                       |
| 64.                             | Trouble waking up in the morning                      |                                                            |
| 66.                             | Restless or disturbed sleep                           |                                                            |
| <b>F5</b>                       | <b>Neurosensory Symptoms</b> ( <i>n</i> = 7)          | 4. Neurosensory, perceptual and motor disturbances         |
| 8.                              | Unusual muscle twitches                               | a. Neurosensory and perceptual                             |
| 29.                             | Tinnitus or noise in the ear                          | b. Motor                                                   |
| 33.                             | Photophobia or dislike of strong light                |                                                            |
| 52.                             | Loss of feeling, tingling or numbness of the skin     |                                                            |
| 56.                             | Muscle weakness or feeling of weakness in the body    |                                                            |
| 68.                             | Hypersensitive skin                                   |                                                            |
| 71.                             | Trouble focusing your eyes                            |                                                            |
|                                 |                                                       | C. Immune, Gastro-intestinal and Genitourinary Impairments |

|            |                                                             |                                                                                                  |
|------------|-------------------------------------------------------------|--------------------------------------------------------------------------------------------------|
| <b>F6</b>  | <b>Immunity Impairment</b> (n = 7)                          |                                                                                                  |
| 2.         | Sinusitis or nasal congestion                               | 1. Flu-like symptoms may be recurrent or chronic and typically activate or worsen with exertion. |
| 31.        | Sore throat                                                 | 2. Susceptibility to viral infections with prolonged recovery periods.                           |
| 45.        | Persistent cough                                            |                                                                                                  |
| 53.        | Sore or swollen lymph glands in the neck                    |                                                                                                  |
| 59.        | Sore or swollen lymph glands                                |                                                                                                  |
| 65.        | Sore or swollen lymph glands in the groin                   |                                                                                                  |
| 76.        | Recurrent mouth ulcers                                      |                                                                                                  |
| <b>F7</b>  | <b>Gastro-intestinal Symptoms</b> (n = 8)                   | 3. Gastro-intestinal tract                                                                       |
| 19.        | Poor appetite                                               |                                                                                                  |
| 23.        | Abdominal pain or tenderness                                |                                                                                                  |
| 37.        | Unexplained diarrhoea                                       |                                                                                                  |
| 40.        | Nausea or upset stomach                                     |                                                                                                  |
| 41.        | Constipation                                                |                                                                                                  |
| 77.        | Symptoms of irritable bowel                                 |                                                                                                  |
| 82.        | Gastric reflux or heartburn                                 |                                                                                                  |
| 83.        | Cravings for certain foods                                  |                                                                                                  |
| <b>F8</b>  | <b>Genitourinary symptoms</b> (n = 3)                       | 4. Genitourinary                                                                                 |
| 43.        | Frequent urination                                          |                                                                                                  |
| 57.        | Burning or uncomfortable urination                          |                                                                                                  |
| 63.        | Urgent urination                                            |                                                                                                  |
| <b>F9</b>  | <b>Sensitivities</b> (n = 2)                                | 5. Sensitivities to food, medications, odours or chemicals                                       |
| 17.        | Allergies, intolerance or reactivity to food                |                                                                                                  |
| 61.        | Reactivity to smells or chemicals                           |                                                                                                  |
| <b>F10</b> | <b>Energy Production/Transportation Impairments</b> (n = 7) | D. Energy production/transportation impairments                                                  |
| 4.         | Faintness or dizziness                                      | 1. Cardiovascular                                                                                |
| 39.        | Heart pounding                                              |                                                                                                  |
| 85.        | Low blood pressure                                          | 2. Respiratory                                                                                   |
| 48.        | Breathlessness or chest pain upon exertion                  |                                                                                                  |
| 6.         | Night sweats, unusual sweating while asleep                 | 3. Loss of thermostatic stability                                                                |
| 49.        | Hot and cold spells or recurrent feverishness               | 4. Intolerance of extremes of temperature                                                        |
| 75.        | Cold hands or feet                                          |                                                                                                  |
| <b>F11</b> | <b>Mood</b> (n = 8)                                         | <i>No reference made to psychological or mood symptoms on the ICC.</i>                           |
| 3.         | Repeated unpleasant thoughts                                |                                                                                                  |
| 5.         | Loss of libido or sexual interest                           |                                                                                                  |
| 20.        | Crying easily over your problems                            |                                                                                                  |
| 30.        | Feeling blue as a results of your problem                   |                                                                                                  |
| 32.        | Feeling no interest in things                               |                                                                                                  |
| 54.        | Feelings of hopelessness about the future                   |                                                                                                  |
| 72.        | Spells of panic related to your problems                    |                                                                                                  |

|            |                                                        |                               |
|------------|--------------------------------------------------------|-------------------------------|
| 87.        | Feeling anxious                                        |                               |
| <b>F12</b> | <b>ICC Symptom Score</b> ( <i>n</i> = 63)              |                               |
|            | All items from F1-F10                                  |                               |
| <b>F13</b> | <b>Total Symptom Score</b> ( <i>n</i> = 71)            |                               |
|            | All factor items, ICC and mood items combined.         |                               |
|            | <b>Items Omitted</b> ( <i>n</i> = 17)                  | <b>N/A</b>                    |
| 11.        | Grinding or clenching your teeth                       | <i>Unsure about placement</i> |
| 12.        | Chest or heart pain                                    | <i>Unsure about placement</i> |
| 18.        | Arthritis                                              | <i>Non-ME/CFS Symptom</i>     |
| 28.        | Feeling that your problems are disrupting your life    | <i>Secondary</i>              |
| 35.        | Stress from financial problems                         | <i>Secondary</i>              |
| 36.        | Feeling that others are unsympathetic to your problems | <i>Secondary</i>              |
| 47.        | Ovulation or menstruation pain                         | <i>Extensive missing data</i> |
| 60.        | Orchialgia or testicular pain                          | <i>Extensive missing data</i> |
| 67.        | Vaginal irritation or discomfort                       | <i>Extensive missing data</i> |
| 73.        | Sciatica or numbness/tingling down the back of the leg | <i>Unsure about placement</i> |
| 74.        | Frequently getting into arguments                      | <i>Secondary</i>              |
| 79.        | Stressful events in your life related to your problems | <i>Secondary</i>              |
| 80.        | Dermatitis                                             | <i>Unsure about placement</i> |
| 81.        | Stress over family problems                            | <i>Secondary</i>              |
| 84.        | High blood pressure                                    | <i>Unsure about placement</i> |
| 86.        | Stress from work problems                              | <i>Secondary</i>              |
| 88.        | Feelings of guilt                                      | <i>Unsure about placement</i> |

**Table S1.** ME/CFS symptom factor structure. Classification of BPQ items according to International Consensus Criteria (10). BPQ: Bioscreen Patient Questionnaire.

|                                |               |               | Total N                          |                    |                    | Males            |                    |                    | Females          |                    |                    | Sex Comparison |        |       |
|--------------------------------|---------------|---------------|----------------------------------|--------------------|--------------------|------------------|--------------------|--------------------|------------------|--------------------|--------------------|----------------|--------|-------|
|                                |               |               | N                                | M<br>(SD)          | Mdn<br>(Range)     | N                | M<br>(SD)          | Mdn<br>(Range)     | N                | M<br>(SD)          | Mdn<br>(Range)     | U              | p      | r     |
|                                |               |               | <b>Selected Anaerobic Genera</b> |                    |                    |                  |                    |                    |                  |                    |                    |                |        |       |
| <i>Bacteroides</i>             | Count (CFU/g) | 270           | 9.02<br>(2.22)                   | 10<br>(0-11)       | 85                 | 8.76<br>(2.71)   | 10<br>(0-11)       | 185                | 9.14<br>(1.95)   | 10<br>(0-11)       | 8033.0             | 0.752          | 0.02   |       |
|                                | RA (%)        | 270           | 58.35<br>(31.59)                 | 61.45<br>(0-100)   | 85                 | 58.21<br>(31.47) | 58.97<br>(0-100)   | 185                | 58.41<br>(31.73) | 62.30<br>(0-100)   | 7965.0             | 0.863          | 0.01   |       |
| <i>Bifidobacterium</i>         | Count (CFU/g) | 271           | 5.54<br>(3.97)                   | 8<br>(0-10)        | 86                 | 5.48<br>(4.10)   | 8.00<br>(0-10)     | 185                | 5.61<br>(3.91)   | 7<br>(0-10)        | 7910.0             | 0.939          | -0.01  |       |
|                                | RA(%)         | 271           | 11.44<br>(19.66)                 | 0.48<br>(0-89.26)  | 86                 | 11.81<br>(20.17) | 0.76<br>(0-89.26)  | 185                | 11.27<br>(19.46) | 0.38<br>(0-81.35)  | 7861.0             | 0.874          | -0.001 |       |
| <i>Clostridium</i>             | Count (CFU/g) | 270           | 3.49<br>(4.15)                   | 0<br>(0-10)        | 85                 | 3.11<br>(4.07)   | 0<br>(0-10)        | 185                | 3.66<br>(4.18)   | 0<br>(0-10)        | 8416.5             | 0.297          | 0.06   |       |
|                                | RA (%)        | 270           | 3.47<br>(8.26)                   | 0<br>(0-53.17)     | 85                 | 2.83<br>(6.46)   | 0<br>(0-35.45)     | 185                | 3.76<br>(8.97)   | 0.00<br>(0-53.17)  | 8380.5             | 0.333          | 0.06   |       |
| <i>Eubacterium</i>             | Count (CFU/g) | 270           | 5.11<br>(4.57)                   | 8<br>(0-11)        | 85                 | 5.00<br>(4.66)   | 8<br>(0-10)        | 185                | 5.16<br>(4.55)   | 8<br>(0-11)        | 7791.5             | 0.899          | 0.01   |       |
|                                | RA (%)        | 270           | 17.10<br>(24.25)                 | 5.30<br>(0-100)    | 85                 | 15.51<br>(20.43) | 4.16<br>(0-81.55)  | 185                | 17.84<br>(25.84) | 5.98<br>(0-100)    | 8048.5             | 0.744          | 0.02   |       |
| <i>Lactobacillus</i>           | Count (CFU/g) | 271           | 3.68<br>(3.45)                   | 5<br>(0-10)        | 86                 | 3.83<br>(3.45)   | 5<br>(0-9)         | 185                | 3.62<br>(3.45)   | 5<br>(0-10)        | 7734.5             | 0.700          | -0.02  |       |
|                                | RA (%)        | 271           | 1.62<br>(6.76)                   | 0.001<br>(0-69.75) | 86                 | 1.89<br>(9.25)   | 0.001<br>(0-69.75) | 185                | 1.49<br>(5.24)   | 0.001<br>(0-39.20) | 7766.0             | 0.742          | -0.02  |       |
| <b>Selected Aerobic Genera</b> |               |               |                                  |                    |                    |                  |                    |                    |                  |                    |                    |                |        |       |
| <i>Enterococcus</i>            | Count (CFU/g) | 274           | 1.81<br>(2.83)                   | 0<br>(0-8)         | 86                 | 1.78<br>(2.80)   | 0<br>(0-8)         | 188                | 1.83<br>(2.84)   | 0<br>(0-8)         | 8182.0             | 0.843          | 0.01   |       |
|                                | RA (%)        | 274           | 0.44<br>(6.05)                   | 0<br>(0-100)       | 86                 | 0.13<br>(0.75)   | 0.00<br>(0-5.45)   | 188                | 0.58<br>(7.29)   | 0.00<br>(0-100)    | 8155.0             | 0.886          | 0.01   |       |
| <i>Escherichia</i>             | Count (CFU/g) | 247           | 5.84<br>(2.08)                   | 6<br>(0-9)         | 86                 | 6.10<br>(2.01)   | 6<br>(0-9)         | 188                | 5.72<br>(2.11)   | 6<br>(0-8)         | 7097.5             | 0.093          | -0.10  |       |
|                                | RA (%)        | 272           | 1.15<br>(7.67)                   | 0.04<br>(0-87.59)  | 86                 | 2.76<br>(13.30)  | 0.05<br>(0-87.59)  | 186                | 0.40<br>(1.75)   | 0.04<br>(0-22.27)  | 7108.0             | 0.140          | -0.089 |       |
| <i>Streptococcus</i>           | Count (CFU/g) | 274           | 4.51<br>(2.67)                   | 6.00<br>(0-9)      | 86                 | 4.38<br>(2.80)   | 5.5<br>(0-8)       | 188                | 4.56<br>(2.61)   | 6<br>(0-9)         | 8291.5             | 0.726          | 0.02   |       |
|                                | RA (%)        | 272           | 0.18<br>(0.99)                   | 0.01<br>(0-11.17)  | 86                 | 2.48<br>(1.25)   | 0.004<br>(0-11.17) | 186                | 0.15<br>(0.85)   | 0.01<br>(0-10.49)  | 8333.0             | 0.576          | 0.03   |       |
| <b>Total Bacteria</b>          |               | Count (CFU/g) | 271                              | 9.73<br>(0.66)     | 10<br>(6-11)       | 86               | 9.76<br>(0.65)     | 10<br>(7-11)       | 185              | 9.72<br>(0.67)     | 10<br>(6-11)       | 7097.5         | 0.093  | -0.10 |
| <b>Aerobic:Anaerobic Ratio</b> |               |               | 270                              | 9.75<br>(45.94)    | 1.21<br>(0-666.73) | 85               | 15.95<br>(73.40)   | 1.32<br>(0-666.73) | 185              | 6.90<br>(24.50)    | 1.10<br>(0-286.85) | 6844.5         | 0.088  | 0.10  |

**Table S2.** Microbial genera descriptive statistics and sex comparison results. Descriptive statistics for each microbial genus (count and relative abundance separately) across total participants, males and females. Count (CFU/g): Exponent value presented (i.e., 9.02 =  $10^{9.02}$ ). Relative abundance (RA): ratio of genera viable count divided by total bacteria count expressed as a percentage. Total Bacteria count: exponent value of total bacteria detectable on MALDI-TOF MS assessment. Aerobic:Anaerobic Ratio: total detectable aerobic bacteria divided by total detectable anaerobic bacteria multiplied by 1000. *U*: Mann Whitney test value calculated by comparing the rank order of scores between two groups (52). Effect sizes (*r*) calculated from Mann-Whitney tests comparing differences in the microbial distribution between males and females. Effect sizes were classified as small (.01), moderate (.03) and large (.05) (51). No significant sex differences were shown ( $P > 0.05$ ).

|     |           | Selected Anaerobic Genera |      |                        |        |                    |       |                    |       |                      |       | Selected Aerobic Genera |       |                    |      |                      |        | Total Bacteria<br>Count | A:AN Ratio |       |      |    |
|-----|-----------|---------------------------|------|------------------------|--------|--------------------|-------|--------------------|-------|----------------------|-------|-------------------------|-------|--------------------|------|----------------------|--------|-------------------------|------------|-------|------|----|
|     |           | <i>Bacteroides</i>        |      | <i>Bifidobacterium</i> |        | <i>Clostridium</i> |       | <i>Eubacterium</i> |       | <i>Lactobacillus</i> |       | <i>Enterococcus</i>     |       | <i>Escherichia</i> |      | <i>Streptococcus</i> |        |                         | M          | F     | M    | F  |
|     |           | RA                        | RA   | RA                     | RA     | RA                 | RA    | RA                 | RA    | RA                   | RA    | RA                      | RA    | RA                 | RA   | RA                   | RA     |                         | RA         | RA    | RA   | RA |
|     |           | M                         | F    | M                      | F      | M                  | F     | M                  | F     | M                    | F     | M                       | F     | M                  | F    | M                    | F      | M                       | F          | M     | F    |    |
| F1  | $r_{(s)}$ | -.02                      | .07  | -.15                   | -.16*  | .01                | .18*  | .01                | .05   | .22                  | .10   | -.10                    | .06   | .05                | -.02 | .21                  | -.05   | -.07                    | .01        | .08   | .03  |    |
|     | <i>P</i>  | .839                      | .389 | .206                   | .036   | .912               | .019  | .967               | .511  | .063                 | .182  | .378                    | .434  | .654               | .780 | .080                 | .534   | .550                    | .898       | .523  | .700 |    |
|     | <i>n</i>  | 73                        | 166  | 74                     | 166    | 73                 | 166   | 73                 | 166   | 74                   | 166   | 74                      | 169   | 74                 | 167  | 74                   | 167    | 74                      | 166        | 74    | 166  |    |
| F2  | $r_{(s)}$ | .11                       | .04  | -.16                   | -.17*  | -.05               | .22** | .05                | .05   | .34**                | .02   | -.08                    | .01   | .003               | -.06 | .19                  | -.06   | -.05                    | .07        | .01   | .03  |    |
|     | <i>P</i>  | .343                      | .615 | .182                   | .032   | .676               | .005  | .673               | .578  | .003                 | .822  | .492                    | .926  | .981               | .483 | .119                 | .444   | .682                    | .414       | .950  | .716 |    |
|     | <i>n</i>  | 72                        | 158  | 72                     | 158    | 72                 | 158   | 72                 | 158   | 72                   | 158   | 72                      | 161   | 72                 | 159  | 72                   | 159    | 72                      | 158        | 72    | 158  |    |
| F3  | $r_{(s)}$ | .000                      | -.06 | .14                    | -.12   | -.21               | .12   | -.24*              | .06   | .26*                 | -.01  | -.12                    | .15   | -.01               | -.03 | .39***               | -.17*  | -.20                    | .01        | .14   | .04  |    |
|     | <i>P</i>  | 1.000                     | .441 | .241                   | .133   | .078               | .155  | .044               | .443  | .031                 | .885  | .326                    | .056  | .909               | .743 | .001                 | .034   | .098                    | .873       | .255  | .627 |    |
|     | <i>n</i>  | 70                        | 153  | 70                     | 153    | 70                 | 153   | 70                 | 153   | 70                   | 153   | 70                      | 156   | 70                 | 154  | 70                   | 154    | 70                      | 153        | 70    | 153  |    |
| F4  | $r_{(s)}$ | .03                       | .05  | -.08                   | -.15   | -.12               | .24** | -.01               | .01   | .19                  | .03   | -.21                    | -.05  | .04                | .04  | .26*                 | -.14   | -.08                    | -.03       | .07   | .02  |    |
|     | <i>P</i>  | .809                      | .513 | .493                   | .059   | .329               | .002  | .953               | .898  | .107                 | .724  | .072                    | .500  | .707               | .66  | .028                 | .078   | .515                    | .718       | .552  | .792 |    |
|     | <i>n</i>  | 73                        | 164  | 74                     | 164    | 73                 | 164   | 73                 | 164   | 74                   | 164   | 74                      | 167   | 74                 | 165  | 74                   | 165    | 74                      | 164        | 74    | 164  |    |
| F5  | $r_{(s)}$ | -.04                      | .001 | -.01                   | -.17*  | -.04               | .14   | -.08               | -.004 | .35**                | .003  | .07                     | .06   | .05                | -.02 | .17                  | -.16*  | -.08                    | -.02       | .10   | .03  |    |
|     | <i>P</i>  | .752                      | .993 | .906                   | .030   | .746               | .079  | .496               | .964  | .002                 | .972  | .535                    | .479  | .664               | .822 | .147                 | .040   | .498                    | .843       | .377  | .71  |    |
|     | <i>n</i>  | 73                        | 164  | 74                     | 164    | 73                 | 164   | 73                 | 164   | 74                   | 164   | 74                      | 167   | 74                 | 165  | 74                   | 165    | 74                      | 164        | 74    | 164  |    |
| F6  | $r_{(s)}$ | -.08                      | .000 | .02                    | -.10   | -.01               | .16*  | .02                | .01   | .08                  | .02   | -.06                    | .14   | .10                | .004 | .24*                 | -.21** | -.13                    | -.02       | .07   | .06  |    |
|     | <i>P</i>  | .512                      | .999 | .887                   | .214   | .935               | .049  | .868               | .948  | .484                 | .772  | .604                    | .079  | .390               | .964 | .038                 | .007   | .276                    | .827       | .542  | .423 |    |
|     | <i>n</i>  | 73                        | 162  | 74                     | 162    | 73                 | 162   | 73                 | 162   | 74                   | 162   | 74                      | 165   | 74                 | 163  | 74                   | 163    | 74                      | 162        | 74    | 162  |    |
| F7  | $r_{(s)}$ | .01                       | -.07 | -.19                   | -.11   | -.11               | .15   | .10                | .09   | .14                  | .003  | -.14                    | .15*  | -.08               | .02  | .24*                 | -.07   | -.05                    | .06        | -.001 | .07  |    |
|     | <i>P</i>  | .950                      | .414 | .115                   | .156   | .369               | .063  | .391               | .280  | .237                 | .974  | .232                    | .049  | .503               | .841 | .044                 | .383   | .71                     | .478       | .995  | .359 |    |
|     | <i>n</i>  | 73                        | 160  | 73                     | 160    | 73                 | 160   | 73                 | 160   | 73                   | 160   | 73                      | 163   | 73                 | 161  | 73                   | 161    | 73                      | 160        | 73    | 160  |    |
| F8  | $r_{(s)}$ | -.14                      | -.02 | -.01                   | -.10   | -.02               | -.01  | -.02               | .09   | .13                  | -.003 | -.12                    | .01   | .02                | -.03 | .27*                 | -.10   | -.22                    | -.03       | .14   | -.10 |    |
|     | <i>P</i>  | .235                      | .848 | .918                   | .204   | .854               | .861  | .850               | .248  | .262                 | .971  | .283                    | .895  | .833               | .670 | .018                 | .202   | .054                    | .709       | .231  | .211 |    |
|     | <i>n</i>  | 76                        | 167  | 77                     | 167    | 76                 | 167   | 76                 | 167   | 77                   | 167   | 77                      | 170   | 77                 | 168  | 77                   | 168    | 77                      | 167        | 77    | 167  |    |
| F9  | $r_{(s)}$ | -.03                      | .03  | .04                    | -.10   | -.03               | .14   | .03                | .05   | .27*                 | .050  | -.18                    | .21** | -.06               | .01  | .12                  | .02    | -.001                   | -.01       | -.06  | .10  |    |
|     | <i>P</i>  | .830                      | .713 | .734                   | .193   | .783               | .080  | .791               | .560  | .024                 | .526  | .138                    | .006  | .614               | .918 | .301                 | .772   | .991                    | .931       | .614  | .200 |    |
|     | <i>n</i>  | 71                        | 165  | 72                     | 165    | 71                 | 165   | 71                 | 165   | 72                   | 165   | 72                      | 168   | 72                 | 166  | 72                   | 166    | 72                      | 165        | 72    | 165  |    |
| F10 | $r_{(s)}$ | -.05                      | .13  | .08                    | -.23** | -.10               | .14   | -.05               | -.05  | .07                  | -.04  | .03                     | .05   | .07                | -.01 | .24*                 | -.09   | -.33**                  | -.01       | .13   | .04  |    |
|     | <i>P</i>  | .657                      | .11  | .482                   | .003   | .390               | .073  | .706               | .533  | .555                 | .572  | .776                    | .567  | .535               | .936 | .045                 | .228   | .005                    | .924       | .264  | .629 |    |
|     | <i>n</i>  | 71                        | 164  | 72                     | 164    | 71                 | 164   | 71                 | 164   | 72                   | 164   | 72                      | 167   | 72                 | 165  | 72                   | 165    | 72                      | 164        | 72    | 164  |    |
| F11 | $r_{(s)}$ | .20                       | .04  | -.07                   | -.15   | -.25*              | .15   | -.10               | -.002 | .28*                 | -.07  | .03                     | -.03  | .01                | .02  | .20                  | -.06   | -.001                   | -.03       | .01   | .04  |    |
|     | <i>P</i>  | .106                      | .66  | .554                   | .06    | .039               | .065  | .417               | .981  | .019                 | .421  | .826                    | .732  | .970               | .828 | .097                 | .441   | .991                    | .761       | .922  | .590 |    |
|     | <i>n</i>  | 68                        | 156  | 69                     | 156    | 68                 | 156   | 68                 | 156   | 69                   | 156   | 69                      | 159   | 69                 | 157  | 69                   | 157    | 69                      | 156        | 69    | 156  |    |
| F12 | $r_{(s)}$ | -.11                      | .03  | -.10                   | -.18*  | -.001              | .25** | .04                | .02   | .28*                 | -.05  | -.05                    | .11   | .04                | -.04 | .33*                 | -.14   | -.24                    | .07        | .08   | .03  |    |
|     | <i>P</i>  | .422                      | .742 | .455                   | .044   | .996               | .006  | .780               | .860  | .036                 | .552  | .725                    | .214  | .787               | .651 | .013                 | .128   | .068                    | .424       | .543  | .787 |    |
|     | <i>n</i>  | 58                        | 123  | 58                     | 123    | 58                 | 123   | 58                 | 123   | 58                   | 123   | 58                      | 126   | 58                 | 124  | 58                   | 124    | 58                      | 123        | 58    | 123  |    |
| F13 | $r_{(s)}$ | -.08                      | .03  | -.09                   | -.20*  | -.06               | .29** | .03                | -.002 | .29*                 | -.06  | -.03                    | .11   | .03                | -.01 | .31*                 | -.13   | -.25                    | .04        | .06   | .06  |    |
|     | <i>P</i>  | .535                      | .73  | .507                   | .029   | .638               | .002  | .839               | .985  | .028                 | .501  | .815                    | .221  | .829               | .948 | .017                 | .155   | .064                    | .699       | .644  | .495 |    |
|     | <i>n</i>  | 57                        | 117  | 57                     | 117    | 57                 | 117   | 57                 | 117   | 57                   | 117   | 57                      | 120   | 57                 | 118  | 57                   | 118    | 57                      | 117        | 57    | 117  |    |

**Table S3.** Associations between microbial composition and ME/CFS symptom factors. Spearman's rank order correlations ( $r_s$ ) are shown for respective male (M) and female (F) subgroups with variable sample sizes ( $n$ ). Relative abundance (RA): calculated from ratio of each genus viable count divided by total bacteria count expressed as a percentage. Total Bacteria count: calculated from exponent value of total bacteria detectable on MALDI-TOF MS assessment. Aerobic:Anaerobic Ratio: total detectable aerobic

bacteria divided by total detectable anaerobic bacteria multiplied by 1000. Correlations ( $r_s$ ) were classified as small (.01), moderate (.03) and large (.05) (51). \* $P < 0.05$ , \*\* $P \leq 0.01$ , \*\*\* $P \leq 0.001$ .
